# Supplementary material
Source: PubMed Central journal article supplement (PMC6908588)
Supplement: 41396_2019_535_MOESM1_ESM.pdf [file 41396_2019_535_MOESM1_ESM.pdf]

**Supplementary Table 4:** *Habitat explains microbial variance in host species differentially.* PERMANOVA results for individual bird species show habitat is a predictor of microbial variance for the yellow warbler and clay-coloured thrush.

| <b>Bird species</b>              | <b>Factor</b> | <b>r<sup>2</sup></b> | <b>p-value</b> |
|----------------------------------|---------------|----------------------|----------------|
| Buff-throated Saltator           | Habitat       | 0.22                 | 0.649          |
| Clay-coloured Thrush             | Habitat       | 0.1                  | 0.023 *        |
| Orange-billed Nightingale-Thrush | Habitat       | 0.31                 | 0.479          |
| Swainson's Thrush                | Habitat       | 0.26                 | 0.393          |
| Rufous-capped Warbler            | Habitat       | 0.24                 | 0.373          |
| Yellow Warbler                   | Habitat       | 0.11                 | 0.003 **       |
