# Supplementary material
Source: PubMed Central journal article supplement (PMC6908588)
Supplement: 41396_2019_535_MOESM7_ESM.pdf [file 41396_2019_535_MOESM7_ESM.pdf]

**Supplementary Table 1: Bird species and associated metadata.** Six common bird species present throughout different habitats.

| <b>Bird species</b>                                                   | <b>Family</b> | <b>Guild</b>                                           | <b>Diet</b>                                              | <b>Habitats</b>                                                                   | <b>Status</b>       |
|-----------------------------------------------------------------------|---------------|--------------------------------------------------------|----------------------------------------------------------|-----------------------------------------------------------------------------------|---------------------|
| <i>Saltator maximus</i><br>(Buff-throated Saltator)                   | Thraupidae    | Insectivore (60% invertebrates, 30% fruit, 10% nectar) | insects, fruits, nectar, flowers, buds                   | Secondary forest, shady plantations, bushy pastures, semi-open areas, forest edge | Resident            |
| <i>Turdus grayi</i> (Clay-coloured Thrush)                            | Turdidae      | Frugivore (60% fruit, 30% invertebrates, 10% reptiles) | earthworms, slugs, larval/adult insects, lizards, fruits | Suburbs, pastures; nests in open surroundings but forages in dense forests        | Resident            |
| <i>Catharus aurantiirostris</i><br>(Orange-billed Nightingale Thrush) | Turdidae      | Omnivore (50% invertebrates, 30% fruit, 20% seeds)     | insects, spiders, other invertebrates, berries and seeds | Secondary forest, forest edge, plantations and gardens                            | Resident            |
| <i>Catharus ustulatus</i><br>(Swainson's Thrush)                      | Turdidae      | Insectivore (60% invertebrates, 40% fruit)             | Fruits, seeds, few insects and invertebrates             | Lower levels of forests, semi-open, and old second growth                         | Latitudinal migrant |
| <i>Basileuterus rufifrons</i> (Rufous-capped Warbler)                 | Parulidae     | Insectivore (80% invertebrates, 20% fruit)             | small insects, caterpillars, spiders, some berries       | Light woods, coffee plantations, tall second growth                               | Resident            |
| <i>Dendroica petechia</i><br>(Yellow Warbler)                         | Parulidae     | Insectivore (~100% invertebrates)                      | small insects, fruits                                    | Secondary forest, agricultural lands                                              | Latitudinal migrant |
