# Supplementary material
Source: PubMed Central journal article supplement (PMC6908588)
Supplement: 41396_2019_535_MOESM8_ESM.pdf [file 41396_2019_535_MOESM8_ESM.pdf]

**Supplementary Table 2:** *Habitat type and tree cover.* Habitat type canopy cover was averaged over sites, including a short description of each.

| <b>Habitat type</b>     | <b>Mean % canopy cover</b> | <b>Description</b>                                 |
|-------------------------|----------------------------|----------------------------------------------------|
| Monoculture             | 24.65                      | Young and small coffee plants                      |
| Diversified agriculture | 26.18                      | Diversified agriculture with older coffee plants   |
| Riparian corridor       | 37.77                      | Narrow patches of forests along rivers and streams |
| Forest fragments        | 68.71                      | Patches of forests                                 |
| Secondary forest        | 77.32                      | Young forests with thinner canopy                  |
| Primary forest          | 81.58                      | Primary and mature secondary forests               |
