# Supplementary material
Source: PubMed Central journal article supplement (PMC6908588)
Supplement: 41396_2019_535_MOESM9_ESM.pdf [file 41396_2019_535_MOESM9_ESM.pdf]

**Supplementary Table 3:** *Host species and habitat type influence bacterial variation. PERMANOVA test was used to determine if host species, habitat, collection, and their interactions explain the microbial variance in the bird microbiome.*

| <b>Factor</b>                            | <b>r<sup>2</sup></b> | <b>p-value</b> |
|------------------------------------------|----------------------|----------------|
| Bird species                             | 0.09                 | 0.001 ***      |
| Habitat                                  | 0.04                 | 0.09 .         |
| Collection date                          | 0.01                 | 0.135          |
| Bird species * Habitat                   | 0.12                 | 0.049 *        |
| Bird species * Collection date           | 0.04                 | 0.073 .        |
| Collection date * Habitat                | 0.04                 | 0.729          |
| Bird species * Habitat * Collection date | 0.09                 | 0.747          |
